# Supplementary material for: Improved Production of Recombinant Myrosinase in Pichia pastoris
Source: MDPI journal article supplement (doi:10.3390/ijms222111889), 2021-11-02
Supplement: s1 [file s1]

## Supplementary information

### S1: Cultivation media

#### S1.1 Preservation of *P. pastoris* KM71H (Mut<sup>S</sup>):

*P. pastoris* was cryopreserved in YPD [Yeast extract/Peptone/Dextrose medium; 1% (w/v) yeast extract, 2% (w/v) peptone, and 2% (w/v) glucose] in 30% (v/v) glycerol; or kept on a Petri dish containing 2% (w/v) agar and 50 mg/L Zeocin<sup>TM</sup> (InvivoGen, USA).

#### S1.2 Cultivations in 96-deep well plates

**BMD** [Buffered Minimal Dextrose medium; 1.34% (w/v) YNB (Yeast Nitrogen Base),  $4 \times 10^{-5}$ % (w/v) biotin, 1% (w/v) glucose, and 200 mM potassium phosphate buffer, (pH 6)],

**BMM2** [Buffered Minimal Methanol medium; 1.34% (w/v) YNB,  $4.10^{-5}$ % (w/v) biotin, 1% (v/v) methanol, 200 mM potassium phosphate buffer (pH 6)]

**BMM10** [Buffered Minimal Methanol medium; 1.34% (w/v) YNB,  $4.10^{-5}$ % (w/v) biotin, 5% (v/v) methanol, and 200 mM potassium phosphate buffer (pH 6)]

#### S1.3 Flask experiments

**BMGY** [Buffered Glycerol-complex Medium; 1% (w/v) yeast extract, 2% (w/v) peptone, 1.34% (w/v) YNB,  $4 \times 10^{-5}$ % (w/v) biotin, 1% (v/v) glycerol, and 100 mM potassium phosphate (pH 6)]

**BMMH** [Buffered Minimal Methanol Medium; 1.34% (w/v) YNB,  $4 \times 10^{-5}$ % (w/v) biotin, 0.5% (v/v) methanol, and 100 mM potassium phosphate (pH 6)]

#### S1.4 Fermentation experiments

**BSM medium** (Basal Salt Medium; per 1 L: 0.93 g CaSO<sub>4</sub>, 18.2 g K<sub>2</sub>SO<sub>4</sub>, 14.9 g MgSO<sub>4</sub> · 7 H<sub>2</sub>O, 4.13 g KOH, 40 g glycerol, and 26.7 ml 85% H<sub>3</sub>PO<sub>4</sub>)

**PTM1** (trace salts solution; per 1 L: 6 g CuSO<sub>4</sub> · 5 H<sub>2</sub>O, 0.08 g NaI, 3 g MnSO<sub>4</sub> · H<sub>2</sub>O, 0.2 g Na<sub>2</sub>MoO<sub>4</sub> · 2 H<sub>2</sub>O, 0.02 g H<sub>3</sub>BO<sub>3</sub>, 0.5 g CoCl<sub>2</sub>, 20 g ZnCl<sub>2</sub>, 65 g FeSO<sub>4</sub> · 7 H<sub>2</sub>O, 0.2 g biotin, and 9.2 g H<sub>2</sub>SO<sub>4</sub>) per litre of BSM medium.

### S2: Nano-Liquid Chromatography and Mass Spectrometry Analysis (LC-MS-MS) of purified myrosinase (myr-Δ19)

The sample containing 250 µg of protein was digested using trypsin (Sigma-Aldrich, St. Louis, MO, USA) at a ratio of 1:25 (0.2 µg/µL trypsin) overnight at 37 °C. For protein analysis, a nano system liquid chromatograph (Ultimate 3000 RSLC, Thermo Fisher Scientific, Germering, Germany) and mass spectrometer with electrospray ionization (ESI) and a 3D ion trap mass analyzer (Amazon SL, Bruker, Bremen, Germany) were used. The mobile phase consisted of component A [0.1% formic acid (FA) in 2% acetonitrile (ACN)] and component B (0.1% FA in 95% ACN). The loading phase consisted of 0.05% FA in 2% ACN. The mobile phase flow rate was 0.4 µL/min with a gradient in length: 0–50% B for 90 min followed by 10 min at 95% B and 20 min at 4% B. The samples (2 µL) were injected in partial inject mode. The analyzed samples were separated on a 75 µm × 300 mm column with a 3 µm particle size at 100 Å and 40 °C. The spectrometer parameters were set as follows: 1450 V capillary voltage, 0.5 Ψ atomizer pressure, 3.0 L/min gas flow rate, 150 °C gas temperature, positive polarity, and scan range 50–2200 m/z at a scan rate of 8100 m/z/sec.

For database searching and protein identification the following programs were used: the Hystar program to define input LC-MS-MS method, the Data Analysis software to obtain spectra and chromatograms, the Proteinscape software for correlation analysis and the Mascot server 2.5.0. as a search library for protein identification. The parameters used in the Mascot search were the same as previously reported (Andelova et al., 2020).
